# Supplementary material
Source: PubMed Central journal article supplement (PMC7085449)
Supplement: NIHMS1549983-supplement-6.pdf [file NIHMS1549983-supplement-6.pdf]

a

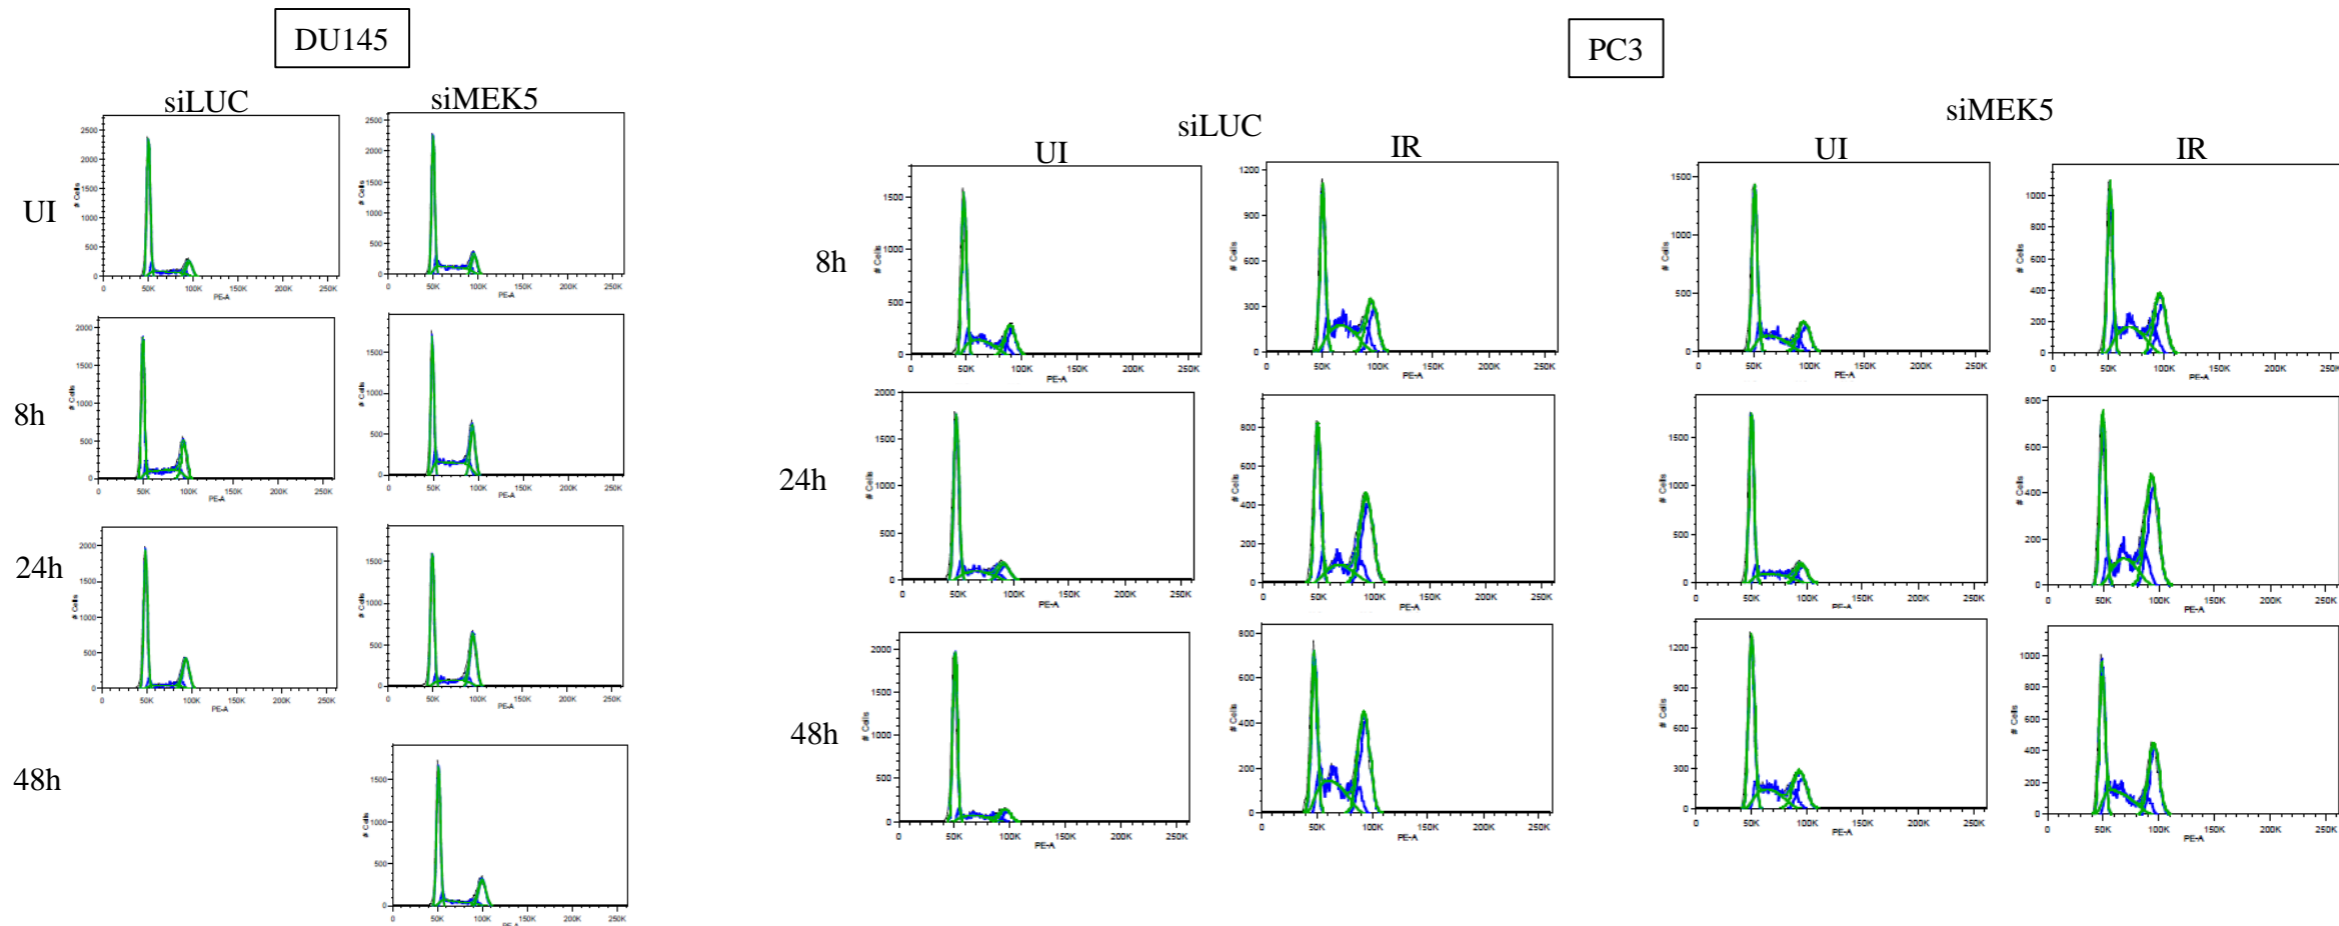

b

|      | PC3/shControl |              |                | PC3/shMEK5-12 |              |                | PC3/shMEK5-22 |               |                |
|------|---------------|--------------|----------------|---------------|--------------|----------------|---------------|---------------|----------------|
| Time | G1 (%) ± SEM  | S (%) ± SEM  | G2/M (%) ± SEM | G1 (%) ± SEM  | S (%) ± SEM  | G2/M (%) ± SEM | G1 (%) ± SEM  | S (%) ± SEM   | G2/M (%) ± SEM |
| UI   | 49.46 ± 2.24  | 32.40 ± 2.61 | 18.14 ± 3.73   | 47.56 ± 8.55  | 31.88 ± 7.36 | 20.56 ± 1.34   | 52.995 ± 2.51 | 27.705 ± 1.81 | 19.305 ± 0.71  |
| 8h   | 25.22 ± 4.77  | 38.15 ± 2.63 | 36.63 ± 2.88   | 29.57 ± 1.25  | 34.23 ± 2.75 | 32.87 ± 4.76   | 34.4 ± 1.83   | 31.775 ± 0.99 | 33.825 ± 0.85  |
| 24h  | 50.62 ± 3.73  | 23.84 ± 5.63 | 25.54 ± 2.68   | 44.17 ± 5.18  | 24.85 ± 4.02 | 30.98 ± 5.03   | 46.82 ± 3.41  | 20.23 ± 0.38  | 32.95 ± 3.79   |

  

|      | DU145/shControl |              |                | DU145/shMEK5-9 |              |                |
|------|-----------------|--------------|----------------|----------------|--------------|----------------|
| Time | G1 (%) ± SEM    | S (%) ± SEM  | G2/M (%) ± SEM | G1 (%) ± SEM   | S (%) ± SEM  | G2/M (%) ± SEM |
| UI   | 57.83 ± 6.78    | 27.70 ± 5.25 | 14.47 ± 3      | 53.47 ± 3.98   | 25.73 ± 0.63 | 20.8 ± 3.47    |
| 8h   | 31.07 ± 0.63    | 38.40 ± 3.44 | 30.54 ± 2.81   | 35.68 ± 3.38   | 30.7 ± 1.04  | 33.595 ± 4.40  |
| 24h  | 61.10 ± 0.73    | 22.98 ± 6.27 | 15.92 ± 5.54   | 54.17 ± 5.10   | 20.38 ± 6.36 | 23.94 ± 2.76   |
