# Supplementary material
Source: PubMed Central journal article supplement (PMC7085449)

Supplementary Figure 8

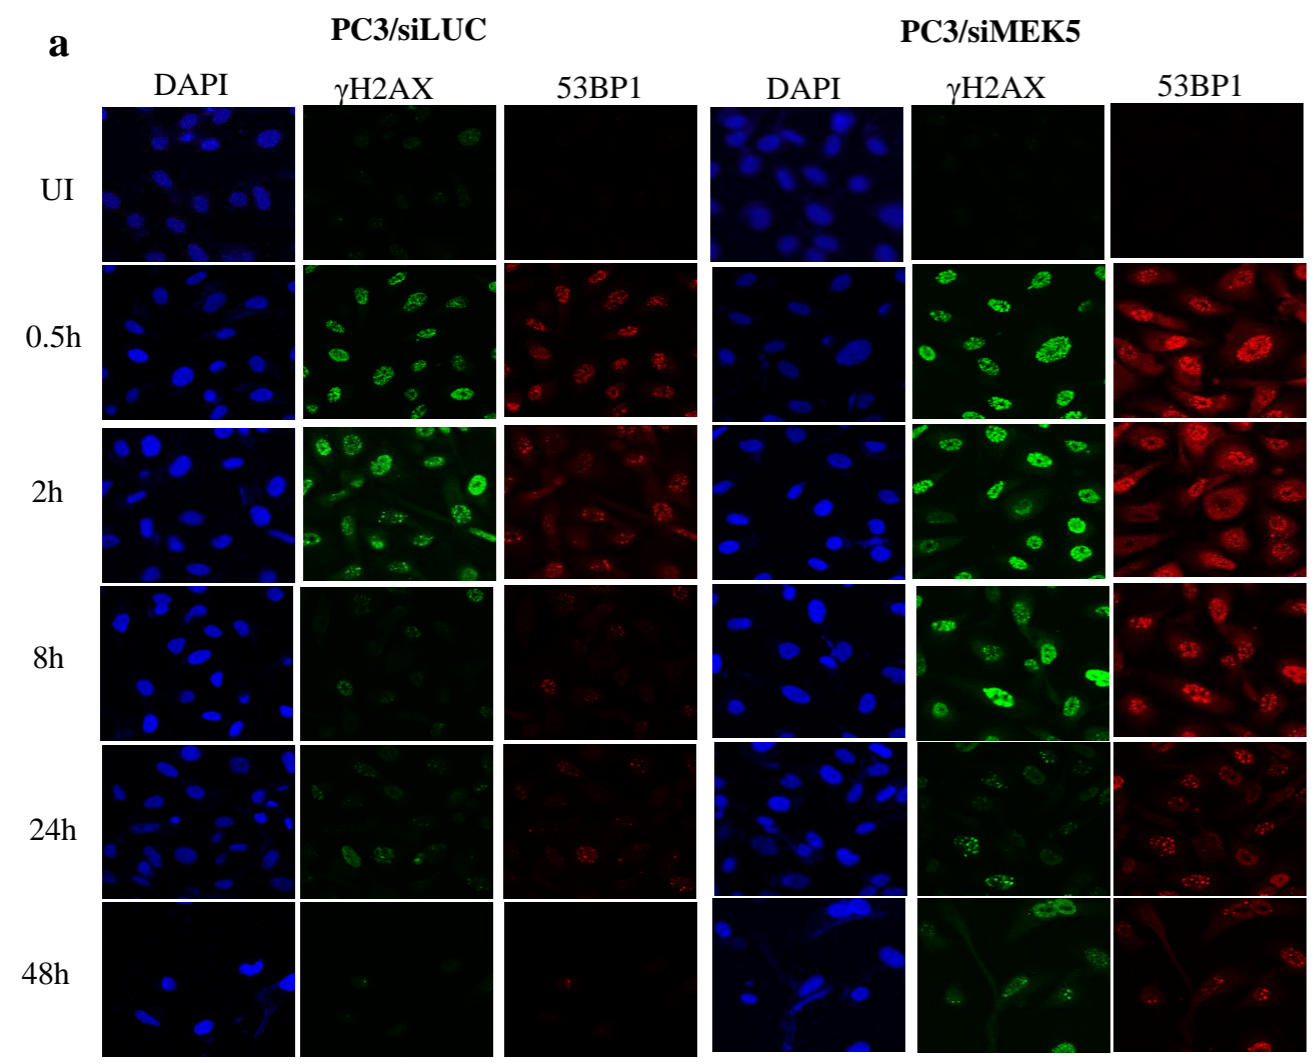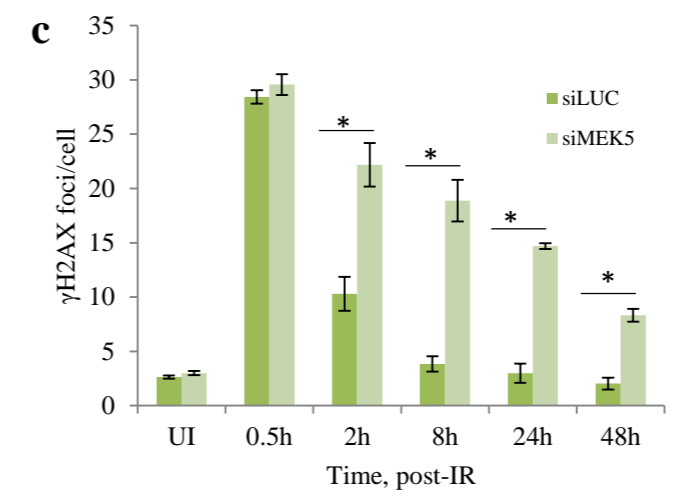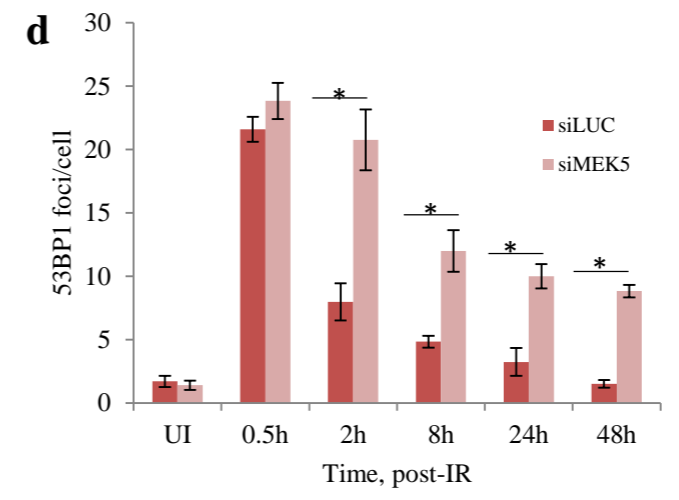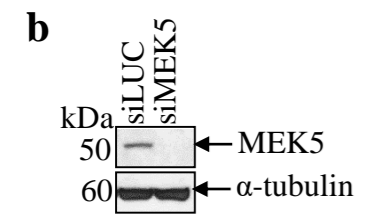

Supplement: NIHMS1549983-supplement-10.pdf [file NIHMS1549983-supplement-10.pdf]

Supplementary Figure 9

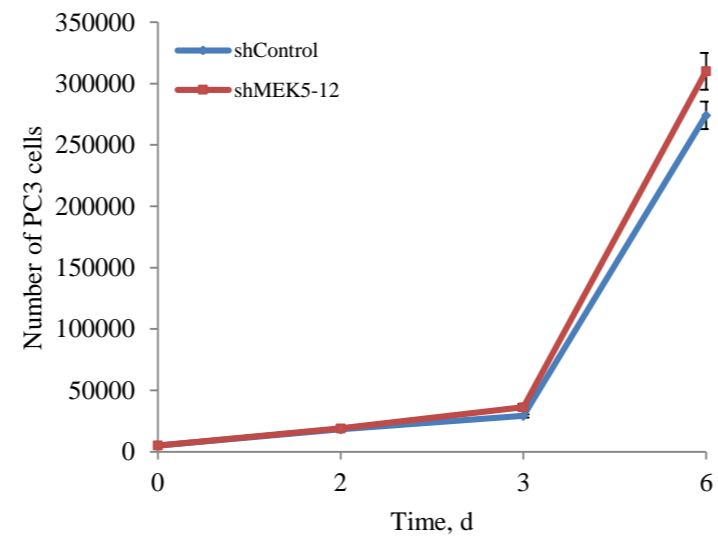

Supplement: NIHMS1549983-supplement-11.pdf [file NIHMS1549983-supplement-11.pdf]

Supplementary Figure 10

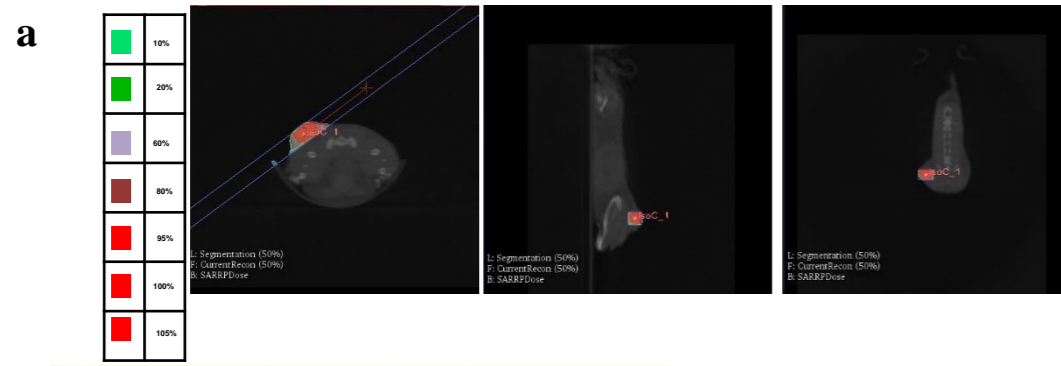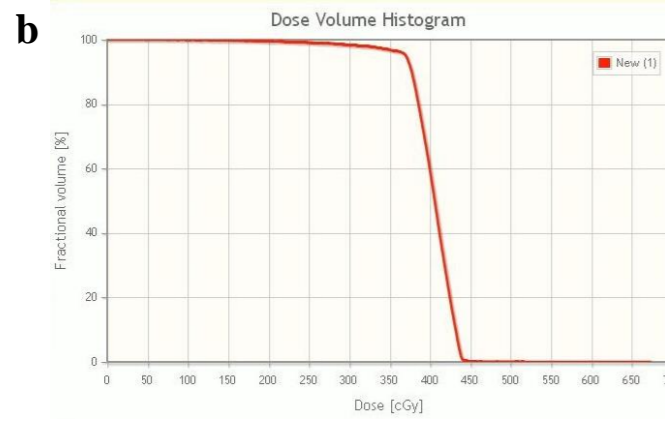

**c**

| Dose (cGy) | Tumor |
|------------|-------|
| Mean       | 382.2 |
| Min        | 19.4  |
| Max        | 392.6 |

Supplement: NIHMS1549983-supplement-12.pdf [file NIHMS1549983-supplement-12.pdf]

Supplementary Figure 1

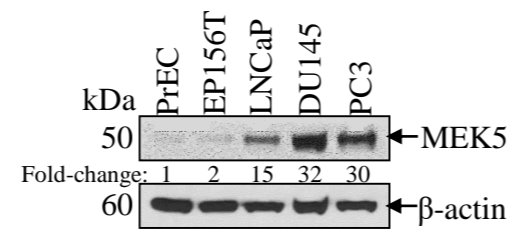

Supplement: NIHMS1549983-supplement-3.pdf [file NIHMS1549983-supplement-3.pdf]

Supplementary Figure 2

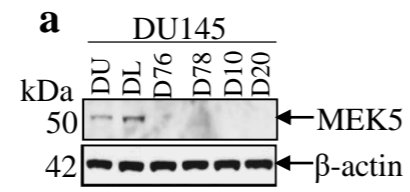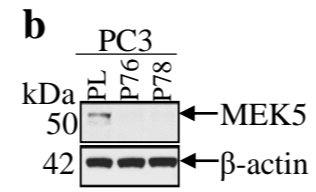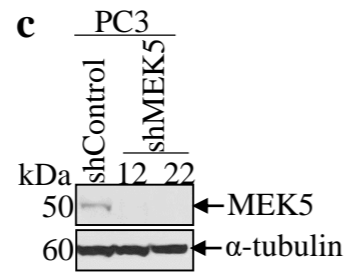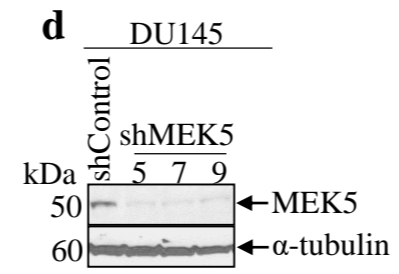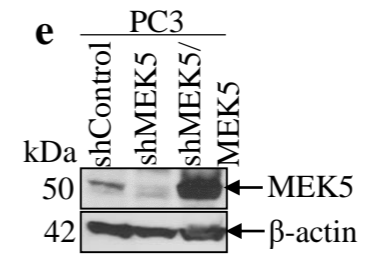

Supplement: NIHMS1549983-supplement-4.pdf [file NIHMS1549983-supplement-4.pdf]

Supplementary Figure 3

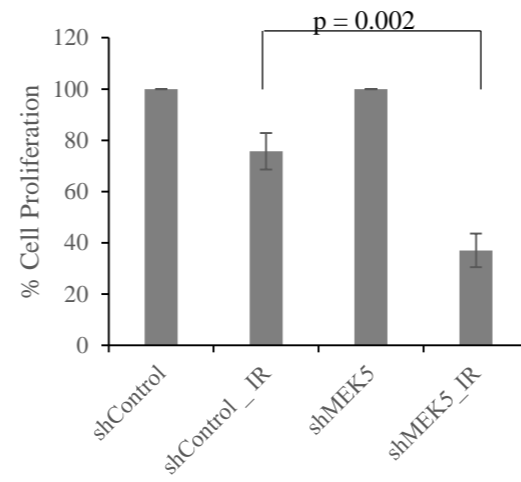

Supplement: NIHMS1549983-supplement-5.pdf [file NIHMS1549983-supplement-5.pdf]

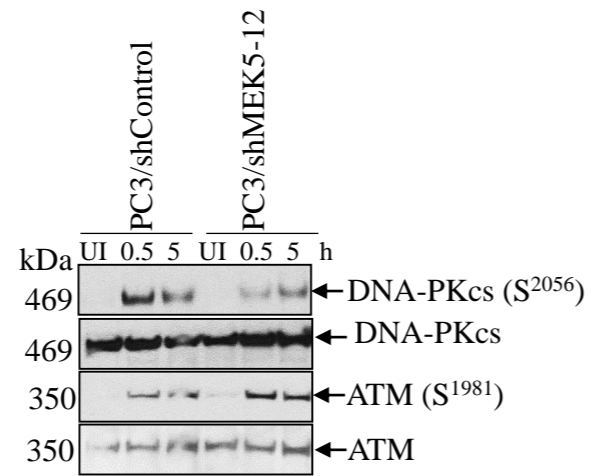

(Expt. 2)

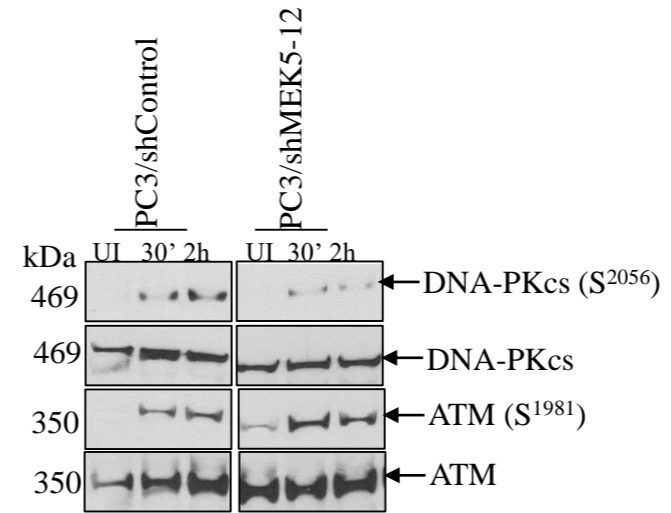

(Expt. 3)

Supplement: NIHMS1549983-supplement-7.pdf [file NIHMS1549983-supplement-7.pdf]

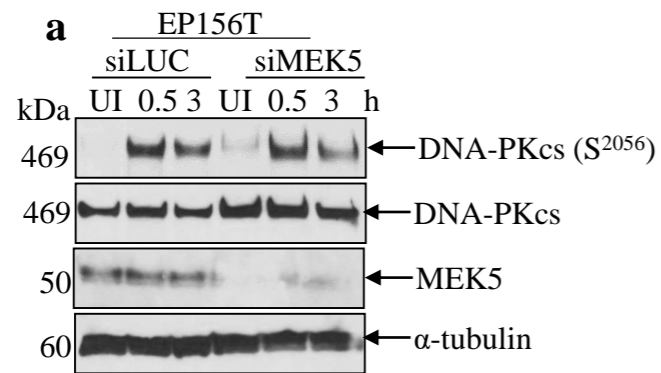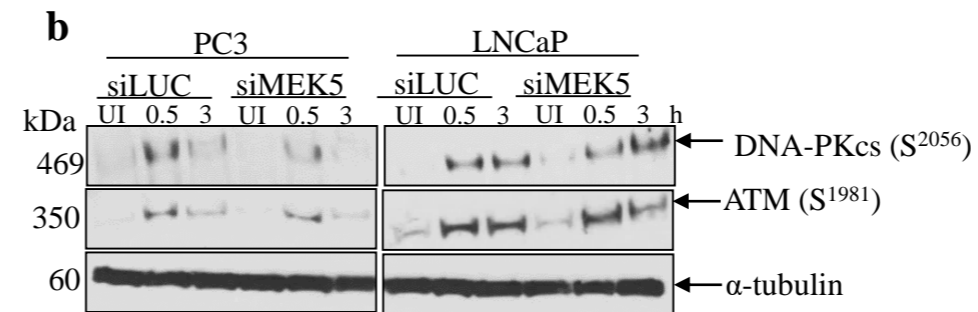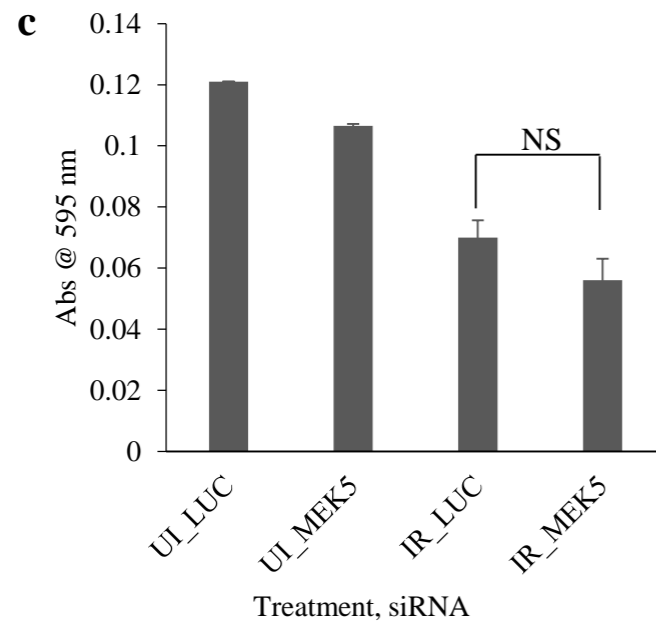

Supplement: NIHMS1549983-supplement-8.pdf [file NIHMS1549983-supplement-8.pdf]

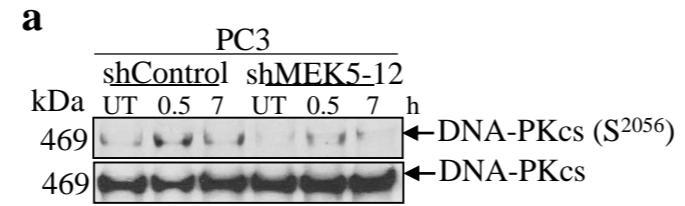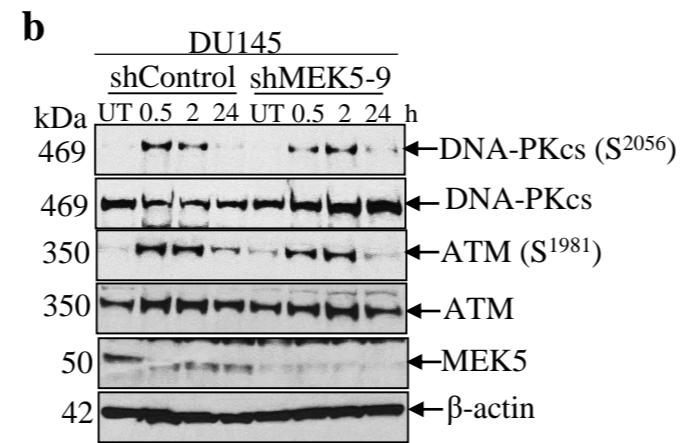

Supplement: NIHMS1549983-supplement-9.pdf [file NIHMS1549983-supplement-9.pdf]
